# Supplementary material for: A Catechol-Meter Based on Conventional Personal Glucose Meter for Portable Detection of Tyrosinase and Sodium Benzoate
Source: MDPI journal article supplement (doi:10.3390/bios12121084), 2022-11-27
Supplement: s1 [file s1]

---

## Supplementary Information

### **A catechol-meter based on conventional personal glucose meter for portable detection of tyrosinase and sodium benzoate**

Tao Tian <sup>1,2</sup>, Wei-Yi Zhang <sup>2</sup>, Hang-Yu Zhou <sup>2</sup>, Li-Jing Peng <sup>2</sup>, Xi Zhou <sup>2</sup>,

Hao Zhang <sup>1,\*</sup> and Feng-Qing Yang <sup>2</sup>

<sup>1</sup> Chongqing Key Laboratory of High Active Traditional Chinese Drug Delivery System, Chongqing Medical and Pharmaceutical College, Chongqing 401331, China

<sup>2</sup> School of Chemistry and Chemical Engineering, Chongqing University, Chongqing 401331, China

\* Correspondence: zhanghao199392@163.com

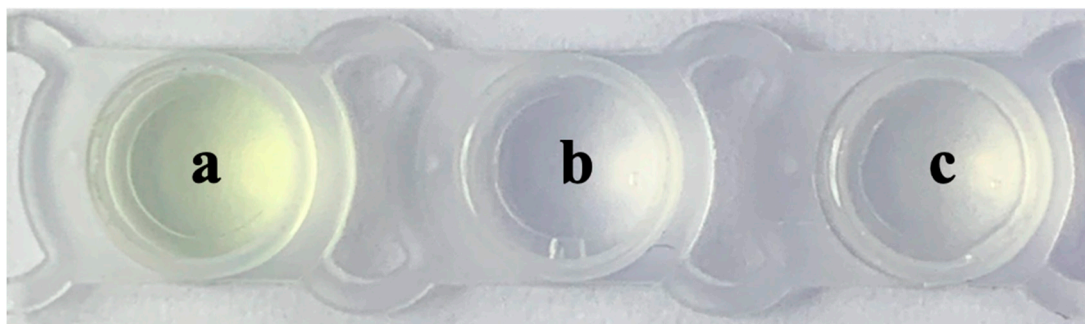

**Figure S1.** The color change of  $K_3[Fe(CN)_6]$  solutions before (a) and 30 s after (c) addition of catechol (CA) (b).

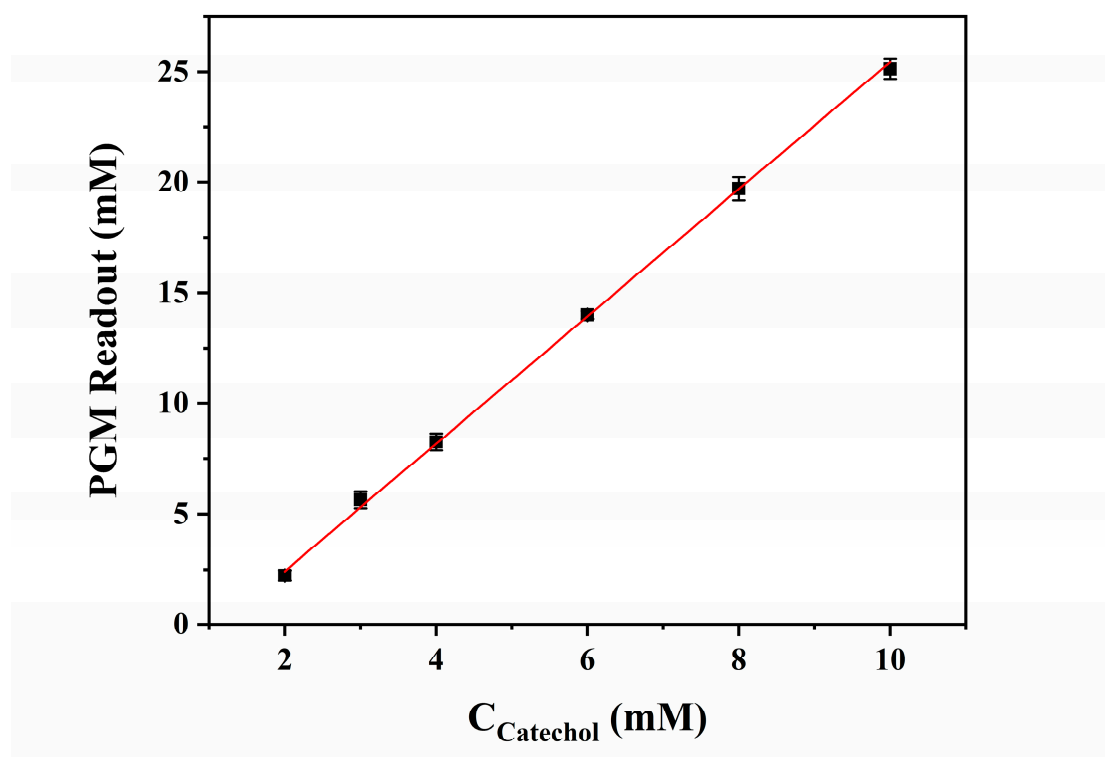

**Figure S2.** The calibration plot for CA determined by PGM ( $n=3$ ).

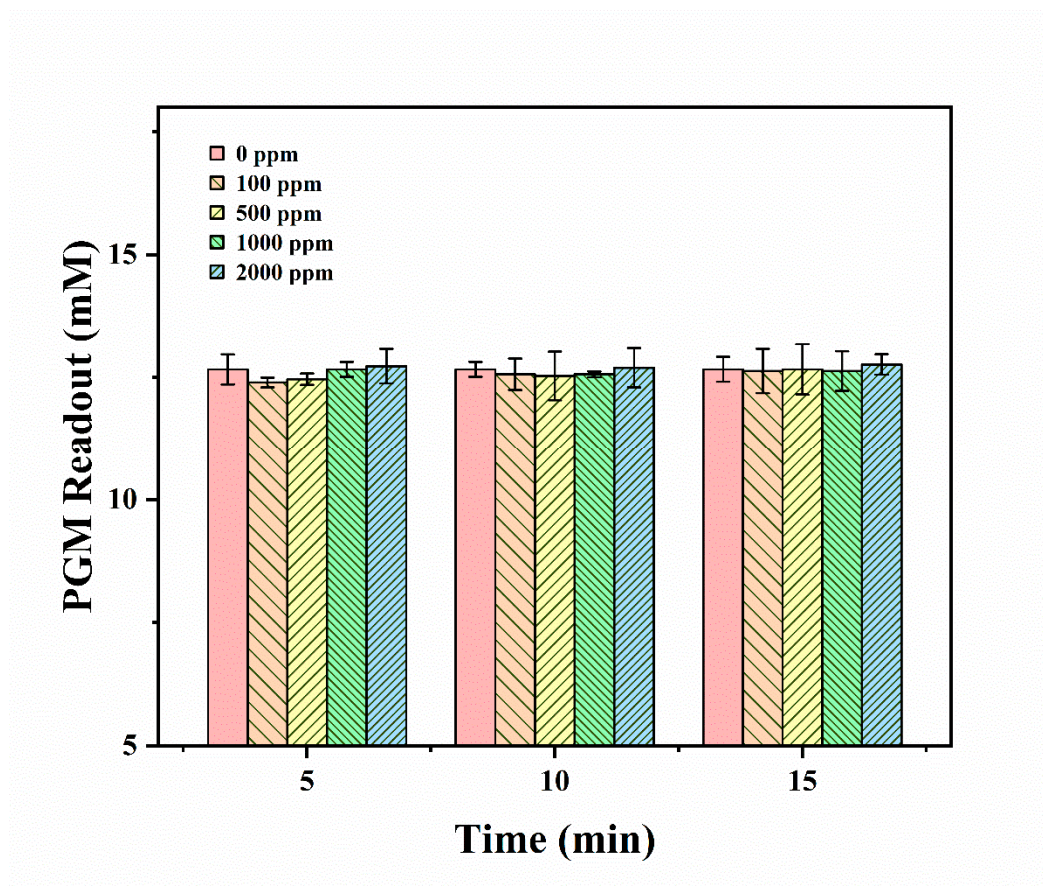

**Figure S3.** Effect of sodium benzoate (SBA) concentration with different incubation time on the PGM readout of CA ( $n=3$ ). Conditions: 15.0 mM of CA, 0–2000 ppm of SBA, incubation time of 5.0, 10.0, and 15.0 min, respectively. All the concentrations are final concentration.

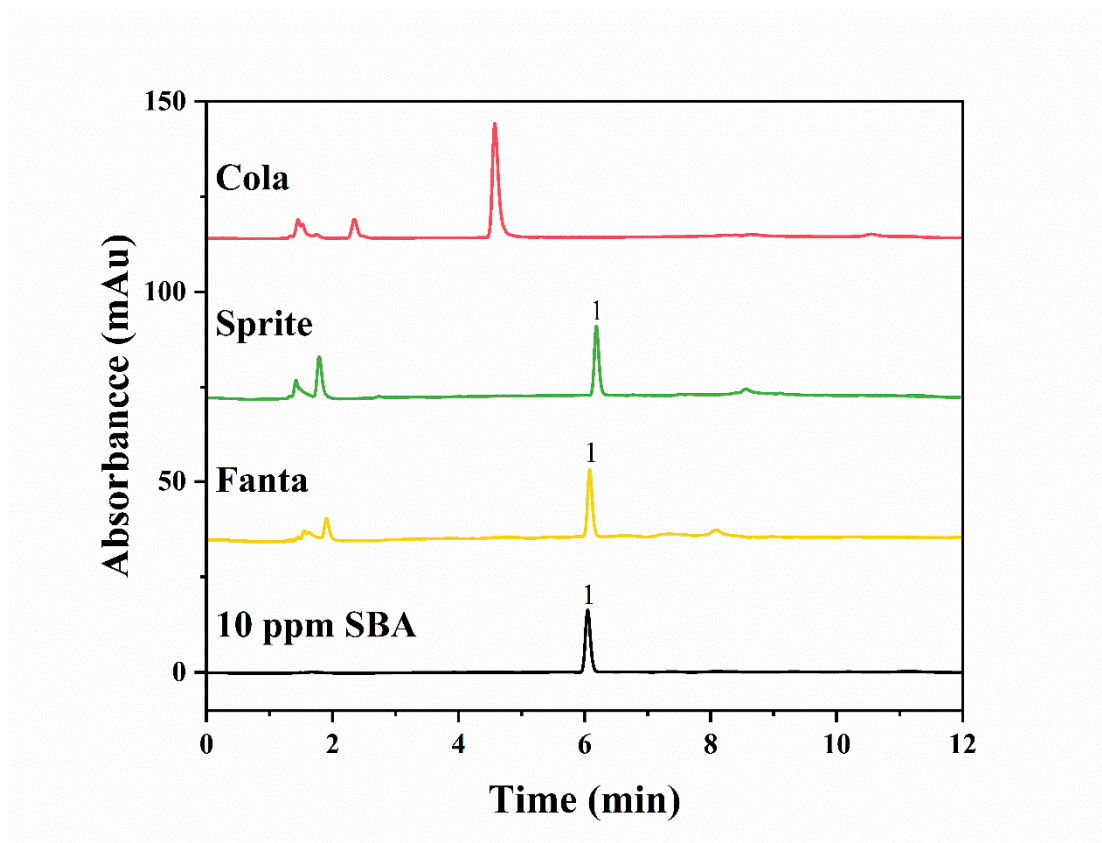

**Figure S4.** HPLC chromatograms of SBA (10 ppm) and three carbonated beverages (Cola, Sprite, and Fanta) diluted 12, 15, and 20 times, respectively. 1, SBA.

---

**Table S1.** Some reported tyrosine-based biosensors for the TYR determination.

| Methods          | Materials              | Line range     | LOD       | References |
|------------------|------------------------|----------------|-----------|------------|
| Fluorescence     | Lucigenin probe        | 0.67–67.0 U/mL | 0.54 U/mL | [1]        |
| Fluorescence     | Ag&Mn:ZnInS QDs        | 0.5–2.5 U/mL   | 0.09 U/mL | [2]        |
| Electrochemistry | WVFY-modified bio-FETs | 10 fM–1 nM     | 1.9 fM    | [3]        |

QDs: quantum dots; WVFY: tetrapeptide tryptophan–valine–phenylalanine–tyrosine; bio-FETs: field-effect transistor-based biosensors; LOD: limit of detection.

**Table S2.** Comparisons of the developed PGM-based method with the reported methods for the TYR determination.

| Methods          | Line range (U·mL <sup>-1</sup> ) | LOD / LOQ (U·mL <sup>-1</sup> ) | Cost | Operator          | References |
|------------------|----------------------------------|---------------------------------|------|-------------------|------------|
| Colorimetry      | –                                | 10 / –                          | High | Highly trained    | [4]        |
| Fluorescence     | 0–800                            | 5                               | High | Highly trained    | [5]        |
| Fluorescence     | 0–80                             | 2.76 / –                        | High | Highly trained    | [6]        |
| Electrochemistry | 2–50                             | 0.83 / –                        | High | Highly trained    | [7]        |
| Electrochemistry | 3.76–27.68                       | 0.52/ –                         | High | Highly trained    | [8]        |
| PGM              | 1.0–103.3                        | – / 1.0                         | Low  | Minimally trained | This work  |

LOD: limit of detection; LOQ: limit of quantitation.

**Table S3.** Recovery studies of TYR in normal human serum detected by the PGM-based method.

| Sample                | Spiked tyrosinase<br>(U/mL) | Found tyrosinase<br>(U/mL) | Recovery (%) | RSD ( <i>n</i> = 3, %) |
|-----------------------|-----------------------------|----------------------------|--------------|------------------------|
| Normal human<br>serum | 0 <sup>a</sup>              | –                          | –            | –                      |
|                       | 26.38                       | 27.64 ± 0.74               | 104.8        | 2.7                    |
|                       | 52.75                       | 51.91 ± 0.98               | 98.4         | 1.9                    |
|                       | 79.13                       | 77.49 ± 0.37               | 97.9         | 0.5                    |

<sup>a</sup> There is no TYR or its content lower than the quantification limit of the PGM-based method.

**Table S4.** Comparisons of the developed PGM-based method with reported methods for the SBA determination.

| Methods     | Analytes | Line range (ppm) | LOD / LOQ (ppm) | References |
|-------------|----------|------------------|-----------------|------------|
| CIC-CD      | BA       | 0.25–20          | 4.1 / 12.6      | [9]        |
| IC-CD       | BA       | -                | 16.5 / 54.5     | [10]       |
| DLLME-SERS  | SBA      | 10–500           | 0.56 / –        | [11]       |
| Paper-based | BA       | 100–700          | 73.6            | [12]       |
| MCA system  | SBA      | 500–5000         | 50 / –          | [13]       |
| PGM-based   | SBA      | 6.25–1000        | – / 6.25        | This work  |

CIC-CD: Capillary ion chromatography with conductivity detection; IC-CD: Ion chromatography with conductivity detection; DLLME-SERS: Dispersive liquid-liquid microextraction combined with surface enhanced Raman scattering; MCA: Microfluidic colorimetric analysis



**Table S5.** The PGM readout of the three beverages spiked with SBA.

| Spiked (ppm) ( <i>n</i> =3) | PGM Readout (mM) |             |             |
|-----------------------------|------------------|-------------|-------------|
|                             | Cola             | Sprite      | Fanta       |
| 0                           | 12.1 ± 0.20      | 17.9 ± 0.12 | 16.6 ± 0.10 |
| 50                          | 15.1 ± 0.10      | 20.4 ± 0.06 | 18.8 ± 0.15 |
| 100                         | 16.2 ± 0.06      | 21.2 ± 0.15 | 19.9 ± 0.15 |
| 200                         | 17.5 ± 0.10      | 22.2 ± 0.06 | 20.9 ± 0.06 |
| Background readout          | 6.2 ± 0.25       | 11.0 ± 0.15 | 9.5 ± 0.36  |

---

## References

1. Ma, X.G.; Gao, W.Y.; Halawa, M.I.; Lan, Y.X.; Li, J.P.; Xu, G.B. Lucigenin fluorescent assay of tyrosinase activity and its inhibitor screening. *Sensors and Actuators B: Chemical* **2019**, *280*, 41-45. [ <https://doi.org/10.1016/j.snb.2018.10.044> ]
2. Liu, Y.B.; Zhang, Y.; Zhang, X.L.; Zhang, W.; Wang, X.H.; Sun, Y.; Ma, P.Y.; Huang, Y.B.; Song, D.Q. Near-infrared fluorescent probe based on Ag&Mn:ZnInS QDs for tyrosinase activity detection and inhibitor screening. *Sensors and Actuators B: Chemical* **2021**, *344*, 130234. [ <https://doi.org/10.1016/j.snb.2021.130234> ]
3. Ren, H.; Xu, T.; Liang, K.; Li, J.; Fang, Y.; Li, F.; Chen, Y.; Zhang, H.; Li, D.; Tang, Y.; et al. Self-assembled peptides-modified flexible field-effect transistors for tyrosinase detection. *iScience* **2022**, *25*, 103673. [ <https://doi.org/10.1016/j.isci.2021.103673> ]
4. Baron, R.; Zayats, M.; Willner, I. Dopamine-, L-DOPA-, adrenaline-, and noradrenaline-induced growth of Au nanoparticles: assays for the detection of neurotransmitters and of tyrosinase activity. *Analytical Chemistry* **2005**, *77*, 1566-1571. [ <https://doi.org/10.1021/ac048691v> ]
5. Li, Y.N.; Deng, B.; Yang, S.X.; Tian, H.Y.; Liu, Y.G.; Sun, B.G. A fluorescent probe for the visible colorimetric detection of tyrosinase. *Chemistryselect* **2021**, *6*, 9046-9051. [ <https://doi.org/10.1002/slct.202102473> ]
6. Wu, X.; Li, L.; Shi, W.; Gong, Q.; Ma, H. Near-infrared fluorescent probe with new recognition moiety for specific detection of tyrosinase activity: Design, synthesis, and application in living cells and zebrafish. *Angewandte Chemie-International Edition* **2016**, *55*, 14728-14732. [ <https://doi.org/10.1002/anie.201609895> ]
7. Shi, L.; Zhang, Z.H.; Zhang, L.M.; Tian, Y. Electrochemical detection of tyrosinase in cell lysates at functionalized nanochannels via amplifying of ionic current response. *Electroanalysis* **2022**, *34*, 1021-1026. [ <https://doi.org/10.1002/elan.202100358> ]
8. Cai, S.; Chen, X.; Wang, L.; Xie, L.; Liu, J.; Zheng, J. Effective detection of tyrosinase by Keggin-type polyoxometalate-based electrochemical sensor. *Journal of Solid State Electrochemistry* **2022**, *26*, 419-429. [ <https://doi.org/10.1007/s10008-021-05085-8> ]
9. D'Amore, T.; Di Taranto, A.; Berardi, G.; Vita, V.; Iammarino, M. Going green in food analysis: A rapid and accurate method for the determination of sorbic acid and benzoic acid in foods by capillary ion chromatography with conductivity detection. *Lwt-Food Science and Technology* **2021**, *141*, 110841. [ <https://doi.org/10.1016/j.lwt.2020.110841> ]
10. Iammarino, M.; Taranto, A.D. Development and validation of an ion chromatography method for the simultaneous determination of seven food additives in cheeses. *Journal of Analytical Sciences* **2013**, *3*, 30-37. [ <https://doi.org/10.4236/jasmi.2013.33A005> ]
11. Xue, L.; Chen, L.; Dong, J.; Cai, L.; Wang, Y.; Chen, X. Dispersive liquid-liquid microextraction coupled with surface enhanced Raman scattering for the rapid detection of sodium benzoate. *Talanta* **2020**, *208*, 120360. [ <https://doi.org/10.1016/j.talanta.2019.120360> ]

- 
12. Hamzah, H.H.; Yusof, N.A.; Salleh, A.B.; Bakar, F.A. An optical test strip for the detection of benzoic acid in food. *Sensors (Basel)* **2011**, *11*, 7302-7313. [ <https://doi.org/10.3390/s110807302> ]
  13. Ko, C.H.; Liu, C.C.; Chen, K.H.; Sheu, F.; Fu, L.M.; Chen, S.J. Microfluidic colorimetric analysis system for sodium benzoate detection in foods. *Food Chemistry* **2021**, *345*, 128773. [ <https://doi.org/10.1016/j.foodchem.2020.128773> ]
